# Supplementary material
Source: PubMed Central journal article supplement (PMC3729533)
Supplement: supp_00427.2011_tableS1.pdf [file supp_00427.2011_tableS1.pdf]

| OFFICIAL<br>GENE<br>SYMBOL | ENTREZ Gene ID | GENE NAME                                                                                                                                                                  |
|----------------------------|----------------|----------------------------------------------------------------------------------------------------------------------------------------------------------------------------|
| ACTB                       | 60             | actin, beta                                                                                                                                                                |
| AHI1                       | 54806          | Abelson helper integration site 1                                                                                                                                          |
| AK5                        | 26289          | adenylate kinase 5                                                                                                                                                         |
| AKT1                       | 207            | v-akt murine thymoma viral oncogene homolog 1                                                                                                                              |
| ARL13B                     | 200894         | ADP-ribosylation factor-like 13B                                                                                                                                           |
| ARL3                       | 403            | ADP-ribosylation factor-like 3                                                                                                                                             |
| ARL6                       | 84100          | ADP-ribosylation factor-like 6                                                                                                                                             |
| AVPR2                      | 554            | arginine vasopressin receptor 2                                                                                                                                            |
| AXIN2                      | 8313           | axin 2                                                                                                                                                                     |
| B2M                        | 567            | beta-2-microglobulin                                                                                                                                                       |
| BBS1                       | 582            | Bardet-Biedl syndrome 1                                                                                                                                                    |
| BBS10                      | 79738          | Bardet-Biedl syndrome 10                                                                                                                                                   |
| BBS2                       | 583            | Bardet-Biedl syndrome 2                                                                                                                                                    |
| BBS4                       | 585            | Bardet-Biedl syndrome 4                                                                                                                                                    |
| BBS5                       | 129880         | Bardet-Biedl syndrome 5                                                                                                                                                    |
| BBS7                       | 55212          | Bardet-Biedl syndrome 7                                                                                                                                                    |
| BBS9                       | 27241          | Bardet-Biedl syndrome 9                                                                                                                                                    |
| BTRC                       | 8945           | beta-transducin repeat containing<br>calmodulin 3 (phosphorylase kinase, delta); calmodulin 2 (phosphorylase kinase,<br>delta); calmodulin 1 (phosphorylase kinase, delta) |
| CALM1                      | 808            | calmodulin 3 (phosphorylase kinase, delta); calmodulin 2 (phosphorylase kinase,<br>delta); calmodulin 1 (phosphorylase kinase, delta)                                      |
| CALM2                      | 808            | calmodulin 3 (phosphorylase kinase, delta); calmodulin 2 (phosphorylase kinase,<br>delta); calmodulin 1 (phosphorylase kinase, delta)                                      |
| CALM3                      | 808            | calmodulin 3 (phosphorylase kinase, delta); calmodulin 2 (phosphorylase kinase,<br>delta); calmodulin 1 (phosphorylase kinase, delta)                                      |
| CC2D2A                     | 57545          | coiled-coil and C2 domain containing 2A                                                                                                                                    |
| CCDC63                     | 160762         | coiled-coil domain containing 63                                                                                                                                           |
| CCND1                      | 595            | cyclin D1                                                                                                                                                                  |
| CDC42                      | 998            | cell division cycle 42 (GTP binding protein, 25kDa); cell division cycle 42 pseudogene 2                                                                                   |
| CDK5RAP2                   | 55755          | CDK5 regulatory subunit associated protein 2                                                                                                                               |
| CDKN1A                     | 1026           | cyclin-dependent kinase inhibitor 1A (p21, Cip1)                                                                                                                           |
| CEP290                     | 80184          | centrosomal protein 290kDa                                                                                                                                                 |
| CETN1                      | 1068           | centrin, EF-hand protein, 1                                                                                                                                                |
| CILD2                      | 56162          | ciliary dyskinesia, primary 2                                                                                                                                              |
| CLUAP1                     | 23059          | clusterin associated protein 1<br>zinc finger protein 91 homolog (mouse); ZFP91-CNTF readthrough transcript; ciliary<br>neurotrophic factor                                |
| CNTF                       | 80829          | neurotrophic factor                                                                                                                                                        |
| CNTFR                      | 1271           | ciliary neurotrophic factor receptor                                                                                                                                       |
| CROCC                      | 9696           | ciliary rootlet coiled-coil, rootletin                                                                                                                                     |
| DACH1                      | 1602           | dachshund homolog 1 (Drosophila)                                                                                                                                           |
| DNAH1                      | 25981          | dynein, axonemal, heavy chain 1                                                                                                                                            |
| DNAH11                     | 8701           | dynein, axonemal, heavy chain 11                                                                                                                                           |
| DNAH5                      | 1767           | dynein, axonemal, heavy chain 5                                                                                                                                            |
| DNAH9                      | 1770           | dynein, axonemal, heavy chain 9                                                                                                                                            |
| DNAI1                      | 27019          | dynein, axonemal, intermediate chain 1                                                                                                                                     |
| DNAI2                      | 64446          | dynein, axonemal, intermediate chain 2                                                                                                                                     |
| DNAL1                      | 83544          | dynein, axonemal, light chain 1                                                                                                                                            |
| DNAL4                      | 10126          | dynein, axonemal, light chain 4                                                                                                                                            |
| DNALI1                     | 7802           | dynein, axonemal, light intermediate chain 1                                                                                                                               |

|          |        |                                                                                                                                                 |
|----------|--------|-------------------------------------------------------------------------------------------------------------------------------------------------|
| DNHD1    | 144132 | dynein heavy chain domain 1                                                                                                                     |
| DPCD     | 25911  | deleted in a mouse model of primary ciliary dyskinesia                                                                                          |
| DPY30    | 84661  | dpy-30 homolog ( <i>C. elegans</i> )<br>dishevelled, dsh homolog 1 ( <i>Drosophila</i> ); dishevelled, dsh homolog 1 ( <i>Drosophila</i> )-like |
| DVL1     | 1855   | 1                                                                                                                                               |
| DYNC1H1  | 1778   | dynein, cytoplasmic 1, heavy chain 1                                                                                                            |
| DYNC1LI1 | 51143  | dynein, cytoplasmic 1, light intermediate chain 1                                                                                               |
| DYNC2H1  | 79659  | dynein, cytoplasmic 2, heavy chain 1                                                                                                            |
| DYNC2LI1 | 51626  | dynein, cytoplasmic 2, light intermediate chain 1                                                                                               |
| DYNLRB2  | 83657  | dynein, light chain, roadblock-type 2                                                                                                           |
| DYNLT1   | 6993   | dynein, light chain, Tctex-type 1                                                                                                               |
| DYNLT3   | 6990   | dynein, light chain, Tctex-type 3                                                                                                               |
| EFHC1    | 114327 | EF-hand domain (C-terminal) containing 1                                                                                                        |
| FAT4     | 79633  | FAT tumor suppressor homolog 4 ( <i>Drosophila</i> )                                                                                            |
| FBLN1    | 2192   | fibulin 1                                                                                                                                       |
| FJX1     | 24147  | four jointed box 1 ( <i>Drosophila</i> )                                                                                                        |
| FOS      | 2353   | v-fos FBJ murine osteosarcoma viral oncogene homolog                                                                                            |
| FUZ      | 80199  | fuzzy homolog ( <i>Drosophila</i> )                                                                                                             |
| FZD1     | 8321   | frizzled homolog 1 ( <i>Drosophila</i> )                                                                                                        |
| Gas8     | 2622   | growth arrest-specific 8                                                                                                                        |
| GLG1     | 2734   | golgi apparatus protein 1                                                                                                                       |
| GLI1     | 2735   | GLI family zinc finger 1                                                                                                                        |
| GLI2     | 2736   | GLI family zinc finger 2                                                                                                                        |
| GLI3     | 2737   | GLI family zinc finger 3                                                                                                                        |
| GLIS2    | 84662  | GLIS family zinc finger 2                                                                                                                       |
| GPAM     | 57678  | glycerol-3-phosphate acyltransferase, mitochondrial                                                                                             |
| GSK3B    | 2932   | glycogen synthase kinase 3 beta                                                                                                                 |
| HNF1B    | 6928   | HNF1 homeobox B                                                                                                                                 |
| HPRT1    | 3251   | hypoxanthine phosphoribosyltransferase 1                                                                                                        |
| HSPA8    | 3312   | heat shock 70kDa protein 8                                                                                                                      |
| HTR6     | 3362   | 5-hydroxytryptamine (serotonin) receptor 6<br>hydrocephalus inducing homolog 2 (mouse); hydrocephalus inducing homolog<br>(mouse)               |
| HYDIN    | 54768  |                                                                                                                                                 |
| IFT122   | 55764  | intraflagellar transport 122 homolog ( <i>Chlamydomonas</i> )                                                                                   |
| IFT140   | 9742   | intraflagellar transport 140 homolog ( <i>Chlamydomonas</i> )                                                                                   |
| IFT172   | 26160  | intraflagellar transport 172 homolog ( <i>Chlamydomonas</i> )                                                                                   |
| IFT20    | 90410  | intraflagellar transport 20 homolog ( <i>Chlamydomonas</i> )                                                                                    |
| IFT52    | 51098  | intraflagellar transport 52 homolog ( <i>Chlamydomonas</i> )                                                                                    |
| IFT57    | 55081  | intraflagellar transport 57 homolog ( <i>Chlamydomonas</i> )                                                                                    |
| IFT74    | 80173  | intraflagellar transport 74 homolog ( <i>Chlamydomonas</i> )                                                                                    |
| IFT80    | 57560  | intraflagellar transport 80 homolog ( <i>Chlamydomonas</i> )                                                                                    |
| IFT81    | 28981  | intraflagellar transport 81 homolog ( <i>Chlamydomonas</i> )                                                                                    |
| IFT88    | 8100   | intraflagellar transport 88 homolog ( <i>Chlamydomonas</i> )                                                                                    |
| IGF1     | 3479   | insulin-like growth factor 1 (somatomedin C)                                                                                                    |
| IHH      | 3549   | Indian hedgehog homolog ( <i>Drosophila</i> )                                                                                                   |
| INS      | 3481   | insulin-like growth factor 2 (somatomedin A); insulin; INS-IGF2 readthrough transcript                                                          |
| INS      | 723961 | insulin-like growth factor 2 (somatomedin A); insulin; INS-IGF2 readthrough transcript                                                          |
| INS      | 3630   | insulin-like growth factor 2 (somatomedin A); insulin; INS-IGF2 readthrough transcript                                                          |
| INTU     | 27152  | inturned planar cell polarity effector homolog ( <i>Drosophila</i> )                                                                            |

|         |        |                                                                                                                                                                         |
|---------|--------|-------------------------------------------------------------------------------------------------------------------------------------------------------------------------|
| INVS    | 27130  | inversin                                                                                                                                                                |
| IQCB1   | 9657   | IQ motif containing B1<br>integrin, beta 1 (fibronectin receptor, beta polypeptide, antigen CD29 includes MDF2,<br>MSK12)                                               |
| ITGB1   | 3688   |                                                                                                                                                                         |
| KATNA1  | 11104  | katanin p60 (ATPase-containing) subunit A 1                                                                                                                             |
| KIF3A   | 11127  | kinesin family member 3A                                                                                                                                                |
| KIF3B   | 9371   | kinesin family member 3B                                                                                                                                                |
| KIF9    | 64147  | kinesin family member 9                                                                                                                                                 |
| KIFAP3  | 22920  | kinesin-associated protein 3                                                                                                                                            |
| KRAS    | 3845   | v-Ki-ras2 Kirsten rat sarcoma viral oncogene homolog                                                                                                                    |
| LRP2    | 4036   | low density lipoprotein-related protein 2                                                                                                                               |
| MAPRE2  | 10982  | microtubule-associated protein, RP/EB family, member 2                                                                                                                  |
| MKKS    | 8195   | McKusick-Kaufman syndrome                                                                                                                                               |
| MKS1    | 54903  | Meckel syndrome, type 1                                                                                                                                                 |
| MMAB    | 326625 | methylmalonic aciduria (cobalamin deficiency) cblB type                                                                                                                 |
| MOS     | 4342   | v-mos Moloney murine sarcoma viral oncogene homolog                                                                                                                     |
| MTOR    | 2475   | mechanistic target of rapamycin (serine/threonine kinase)                                                                                                               |
| MUC5B   | 727897 | mucin 5B, oligomeric mucus/gel-forming                                                                                                                                  |
| NEK8    | 284086 | NIMA (never in mitosis gene a)- related kinase 8                                                                                                                        |
| nphp1   | 4867   | nephronophthisis 1 (juvenile)                                                                                                                                           |
| NPHP3   | 84129  | nephronophthisis 3 (adolescent); acyl-Coenzyme A dehydrogenase family, member 11                                                                                        |
| Nphp4   | 261734 | nephronophthisis 4                                                                                                                                                      |
| OFD1    | 8481   | oral-facial-digital syndrome 1                                                                                                                                          |
| PACRGL  | 133015 | PARK2 co-regulated-like                                                                                                                                                 |
| PDGFRA  | 5156   | platelet-derived growth factor receptor, alpha polypeptide                                                                                                              |
| PFN1    | 5216   | profilin 1                                                                                                                                                              |
| PFN2    | 5217   | profilin 2                                                                                                                                                              |
| PFN3    | 345456 | profilin 3                                                                                                                                                              |
| PIK3CA  | 5290   | phosphoinositide-3-kinase, catalytic, alpha polypeptide                                                                                                                 |
| PKD1    | 5310   | polycystic kidney disease 1 (autosomal dominant)                                                                                                                        |
| PKD1L1  | 168507 | polycystic kidney disease 1 like 1                                                                                                                                      |
| PKD1L2  | 114780 | polycystic kidney disease 1-like 2                                                                                                                                      |
| PKD1L3  | 342372 | polycystic kidney disease 1-like 3                                                                                                                                      |
| PKD2    | 5311   | polycystic kidney disease 2 (autosomal dominant)                                                                                                                        |
| PKD2L1  | 9033   | polycystic kidney disease 2-like 1                                                                                                                                      |
| PKHD1   | 5314   | polycystic kidney and hepatic disease 1 (autosomal recessive)                                                                                                           |
| PPP1CA  | 5499   | protein phosphatase 1, catalytic subunit, alpha isoform<br>protein phosphatase 1, catalytic subunit, beta isoform; speedy homolog A ( <i>Xenopus</i><br><i>laevis</i> ) |
| PPP1CB  | 5500   | protein phosphatase 1, catalytic subunit, beta isoform; speedy homolog A ( <i>Xenopus</i><br><i>laevis</i> )                                                            |
| PPP1CB  | 245711 | protein phosphatase 1, catalytic subunit, gamma isoform                                                                                                                 |
| PPP1CC  | 5501   | protein phosphatase 1, catalytic subunit, gamma isoform                                                                                                                 |
| PPP2CA  | 5515   | protein phosphatase 2 (formerly 2A), catalytic subunit, alpha isoform                                                                                                   |
| PPP2CB  | 5516   | protein phosphatase 2 (formerly 2A), catalytic subunit, beta isoform                                                                                                    |
| PPP2R1A | 5518   | protein phosphatase 2 (formerly 2A), regulatory subunit A, alpha isoform                                                                                                |
| PRPF39  | 55015  | PRP39 pre-mRNA processing factor 39 homolog ( <i>S. cerevisiae</i> )                                                                                                    |
| PTCH1   | 5727   | patched homolog 1 ( <i>Drosophila</i> )                                                                                                                                 |
| PTPN5   | 84867  | protein tyrosine phosphatase, non-receptor type 5 (striatum-enriched)                                                                                                   |
| RAB23   | 51715  | RAB23, member RAS oncogene family                                                                                                                                       |
| RFX3    | 5991   | regulatory factor X, 3 (influences HLA class II expression)                                                                                                             |

|          |           |                                                                                                                                                                              |
|----------|-----------|------------------------------------------------------------------------------------------------------------------------------------------------------------------------------|
| RHOA     | 387       | ras homolog gene family, member A                                                                                                                                            |
| RIBC2    | 26150     | RIB43A domain with coiled-coils 2                                                                                                                                            |
| ROCK2    | 9475      | Rho-associated, coiled-coil containing protein kinase 2                                                                                                                      |
| RP2      | 6102      | retinitis pigmentosa 2 (X-linked recessive)                                                                                                                                  |
| RPGRIP1L | 23322     | RPGRIP1-like<br>ribosomal protein L13a pseudogene 7; ribosomal protein L13a pseudogene 5;<br>ribosomal protein L13a pseudogene 16; ribosomal protein L13a; ribosomal protein |
| RPL13A   | 100129553 | L13a pseudogene 18                                                                                                                                                           |
| RSPH1    | 89765     | radial spoke head 1 homolog (Chlamydomonas)<br>radial spoke head 10 homolog B2 (Chlamydomonas); radial spoke head 10 homolog B                                               |
| RSPH10B  | 222967    | (Chlamydomonas)<br>radial spoke head 10 homolog B2 (Chlamydomonas); radial spoke head 10 homolog B                                                                           |
| RSPH10B2 | 728194    | (Chlamydomonas)                                                                                                                                                              |
| RSPH3    | 83861     | radial spoke 3 homolog (Chlamydomonas)                                                                                                                                       |
| RSPH4A   | 345895    | radial spoke head 4 homolog A (Chlamydomonas)                                                                                                                                |
| RSPH6A   | 81492     | radial spokehead-like 1                                                                                                                                                      |
| RSPH9    | 221421    | radial spoke head 9 homolog (Chlamydomonas)                                                                                                                                  |
| SHH      | 6469      | sonic hedgehog homolog (Drosophila)                                                                                                                                          |
| SMO      | 6608      | smoothened homolog (Drosophila)                                                                                                                                              |
| SNTN     | 132203    | sentan, cilia apical structure protein                                                                                                                                       |
| SSTR3    | 6753      | somatostatin receptor 3                                                                                                                                                      |
| STAT6    | 6778      | signal transducer and activator of transcription 6, interleukin-4 induced                                                                                                    |
| SUFU     | 51684     | suppressor of fused homolog (Drosophila)                                                                                                                                     |
| TEKT1    | 83659     | tektin 1                                                                                                                                                                     |
| TH       | 7054      | tyrosine hydroxylase                                                                                                                                                         |
| TMEM67   | 91147     | transmembrane protein 67                                                                                                                                                     |
| TP53     | 7157      | tumor protein p53                                                                                                                                                            |
| TSC1     | 7248      | tuberous sclerosis 1                                                                                                                                                         |
| TSC2     | 7249      | tuberous sclerosis 2                                                                                                                                                         |
| TTC8     | 123016    | tetratricopeptide repeat domain 8                                                                                                                                            |
| TUBB1    | 81027     | tubulin, beta 1                                                                                                                                                              |
| UGT1A    | 7361      | UDP glucuronosyltransferase 1 family, polypeptide A cluster                                                                                                                  |
| UNC119   | 9094      | unc-119 homolog (C. elegans)                                                                                                                                                 |
| VANGL2   | 57216     | vang-like 2 (van gogh, Drosophila)                                                                                                                                           |
| WDR52    | 55779     | WD repeat domain 52                                                                                                                                                          |
| WDR63    | 126820    | WD repeat domain 63                                                                                                                                                          |
| WDR78    | 79819     | WD repeat domain 78                                                                                                                                                          |
| WNT9B    | 7484      | wingless-type MMTV integration site family, member 9B                                                                                                                        |
| WWTR1    | 25937     | WW domain containing transcription regulator 1                                                                                                                               |
| ICS1     | 3393      | immotile cilia syndrome 1                                                                                                                                                    |
| CROCCP3  | 114819    | ciliary rootlet coiled-coil, rootletin pseudogene 3                                                                                                                          |
| HSP90AA1 | 3320      | heat shock protein 90kDa alpha (cytosolic), class A member 1                                                                                                                 |
| HSP90AA2 | 3324      | heat shock protein 90kDa alpha (cytosolic), class A member 2                                                                                                                 |
| CROCCP2  | 84809     | ciliary rootlet coiled-coil, rootletin pseudogene 2                                                                                                                          |
| CROCCP1  | 392547    | ciliary rootlet coiled-coil, rootletin pseudogene 1                                                                                                                          |
| TRIM32   | 22954     | tripartite motif containing 32                                                                                                                                               |
| ADCY3    | 109       | adenylate cyclase 3                                                                                                                                                          |
| ADCY7    | 113       | adenylate cyclase 7                                                                                                                                                          |
| SPAG16   | 79582     | sperm associated antigen 16                                                                                                                                                  |
